# Supplementary material
Source: PubMed Central journal article supplement (PMC3147701)
Supplement: supp_193_16_4081__2.pdf [file supp_193_16_4081__2.pdf]

Conservatio

Qualit

Consensus

Consensus
